# Supplementary material for: Amphiphilic heteroarm star polymer synthesized by RAFT dispersion polymerization in water/ethanol solution
Source: Royal Society of Chemistry journal article supplement (doi:10.1039/c2cc33812b), 2012-01-01
Supplement: c2cc33812b.pdf [file c2cc33812b.pdf]

# **Amphiphilic heteroarm star polymer synthesized by RAFT dispersion polymerization in water/ethanol solution**

## **Supporting Information**

Xiaofang Shi, Wei Zhou, Qian Qiu and Zesheng An\*

Institute of Nanochemistry and Nanobiology, College of Environmental and Chemical  
Engineering, Shanghai University, Shanghai 200444, P. R. China.

E-mail: an.zesheng@shu.edu.cn

### Materials.

2,2'-Azobis(2-methylpropionamidine)dihydrochloride (V-50, 97%) and 2-methoxyethyl acrylate (MEA, 98%) were purchased from Sigma-Aldrich. *N,N'*-Dimethylacrylamide (98%) was purchased from J&k. 1,6-Hexanediol diacrylate (HDDA) (90%) was purchased from Aladdin Reagent (China). *n*-Butyl acrylate (BA) (CP) and 2,2'-azobis(2-methylpropionitrile) (AIBN, CP), were purchased from Sinopharm Chemical Reagent Co. Ltd. AIBN was recrystallized from methanol twice. All monomers were passed through a column of Al<sub>2</sub>O<sub>3</sub> to remove the inhibitor before use.

### Characterization.

NMR spectra were collected on a Bruker AV 500 MHz spectrometer and chemical shifts were reported using the solvent residue as the reference.

RI-GPC: GPC measurement was performed on a Waters Alliance e2695 GPC system, equipped with a styragel guard column, a Waters styragel HR3 (molecular weight range  $5.0 \times 10^2 - 3.0 \times 10^4$ ), a Waters styragel HR4 (molecular weight range  $5.0 \times 10^3 - 6.0 \times 10^5$ ), and a Waters styragel HR5 (molecular weight range  $5.0 \times 10^4 - 4.0 \times 10^6$ ). Detection was performed on a 2414 refractometer using DMF (HPLC grade, containing 1 mg/mL LiBr) as the eluent at a flow rate of 0.8 mL/min. The temperature of the columns was set at 65 °C and the temperature of the refractometer was set at 45 °C. Analysis of molecular weight and polydispersity index of polymers was performed using Empower 2 software against PMMA standard (molecular weight range  $2.4 \times 10^2 - 1.0 \times 10^6$ ).

Triple-detection GPC: Measurement was performed by Malvern Instruments (China) on a Viscotek/Malvern GPC system consisting of a GPCMax auto-injector fitted to a TDA 305 triple detector array (differential RI, right angle light scattering (RALS), low angle static light scattering (LALS) and four-capillary differential viscometer detectors). The column was

Viscotek I MBMMW, DMF containing 0.02 M LiBr was used as the eluent at a flow rate of 0.7 mL/min, and the temperature of the column was controlled at 50 °C. PMMA standard was used for calibration.

Star polymer sizing was analyzed using dynamic light scattering (DLS) on a Malvern Zetasizer 3000HSA at 25 °C.

Transmission electron microscopy (TEM) imaging was performed on a Jeol 200CX microscope operating at 200 kV. The TEM samples were prepared by depositing the star polymer solution onto the copper grid with a glass capillary tube and were stained with iodine vapor in a sealed vial with a grain of iodine overnight.

Atomic force microscopy (AFM) was performed on a Shimadzu SPM-9600 operating in the tapping mode. The AFM samples were prepared by depositing the star polymer solution onto freshly cleaved mica and dried in air.

### Preparation of arm polymers.

**Poly(*N,N'*-dimethylacrylamide) (PDMA)** was synthesized similarly as previously reported.<sup>1</sup>  $M_n = 8$  kDa (RI-GPC),  $M_w/M_n = 1.10$  (RI-GPC).

#### (1) Poly(2-methoxy ethyl acrylate) (PMEA):

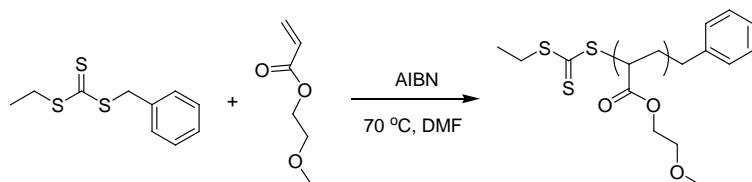

PMEA was synthesized in DMF at an MEA concentration of 50% w/v at 70 °C. Chain transfer agent benzyl ethyl trithiocarbonate (0.35 g, 1.54 mmol) and MEA (20 g, 0.154 mol) were dissolved in 40 mL of DMF. The solution was degassed with nitrogen at 0 °C for 40 min before immersion into a preheated oil bath at 70 °C. After the temperature was stabilized, a degassed

solution of AIBN (5.1 mg, 0.03 mmol) in DMF was injected via a microsyringe. The polymerization was last for 3 h. The conversion of monomers was calculated to be 74%. The polymer was purified by pouring the polymerization mixture into HCl solution (pH=4) to precipitate the polymer, which was then redissolved into THF and precipitated into acid solution. The collected polymer was dried under vacuum to get 14.7 g (72% yield) of a viscous liquid.  $M_n = 14$  kDa (RI-GPC),  $M_w/M_n = 1.12$  (RI-GPC).

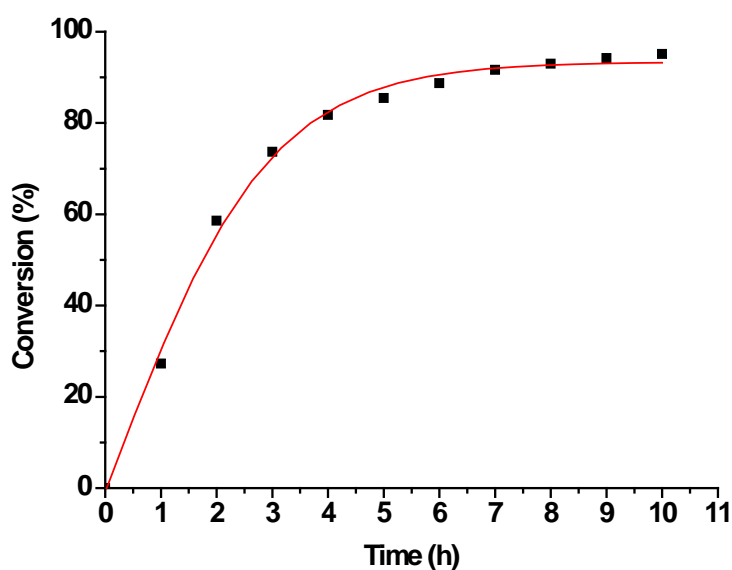

**Fig. S1** MEA conversion vs time under the polymerization condition described above. [CTA]:[MEA]:[AIBN]=1:100:0.02, [MEA]=50% w/v in DMF, 70°C.

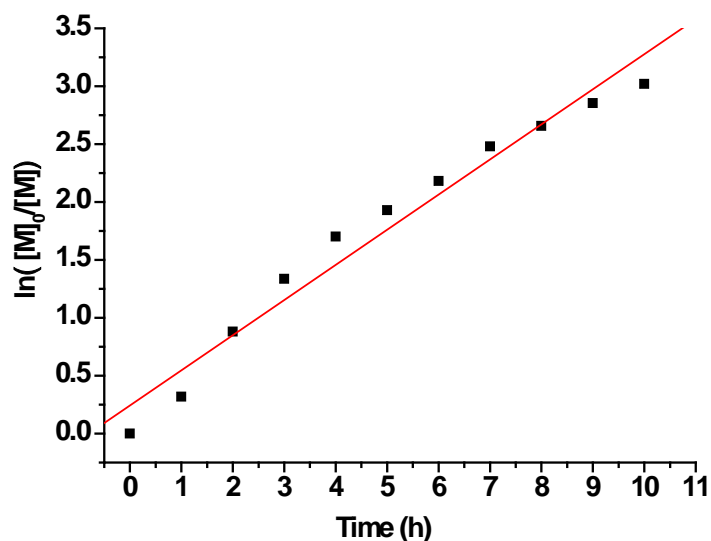

**Fig. S2** Pseudo first-order kinetic plot of MEA polymerization under the polymerization condition described above. [CTA]:[MEA]:[AIBN]=1:100:0.02, [MEA]=50% w/v in DMF, 70°C.

### Preparation of star polymers

The homoarm and heteroarm CCSs were synthesized at 70 °C using BA as the spacing monomer, HDDA as the cross-linker and V-50 as the initiator. The concentration of the arm polymer(s) was maintained at 10.7 mmol/L (10% w/v for PMEAs). The molar ratio of arm polymer:BA:HDDA:V-50 was 1:10:5:0.1. The conversion of arm polymer to star polymer was monitored with GPC. To quantify the arm polymer conversion, 0.2 mL of the CCS synthesis solution was withdrawn at pre-determined time intervals, the solvent of which was removed, and the left material was dissolved in 1 mL of HPLC grade DMF for GPC measurement. The arm conversion was calculated as:

Arm conversion = (Intensity of Arm GPC peak before reaction - Intensity of Arm GPC peak at a specific reaction time) / Intensity of Arm GPC peak before reaction.

#### (1) Optimization of conditions for PMEAs homoarm CCS

The solvent polarity of water/ethanol solution was optimized in order to obtain well-defined PMEAs homoarm CCS. The water/ethanol solution composition was varied by increasing the

volumetric fraction of water from 20%, 30%, 40%, 50% to 60%. It was found that in 20% and 30% water/ethanol solution, no CCSs were formed. Defined CCSs were formed in 40%-60% water/ethanol solutions but some precipitate was observed in 60% water/ethanol solution due to the decreased solubility. The formation of PMEAs CCS in 40% and 50% water/ethanol solution is shown in Fig. S3 and Fig. S4, respectively.

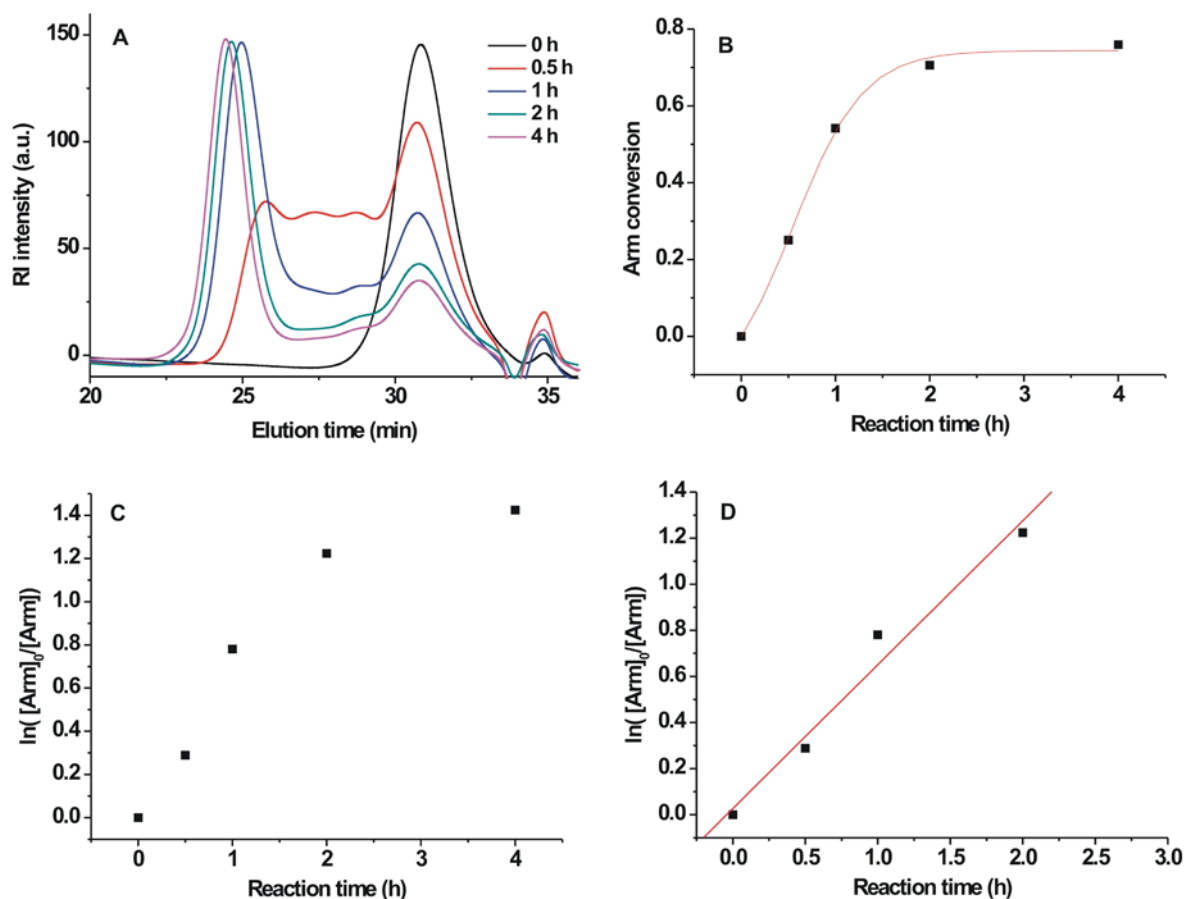

**Fig. S3** PMEAs homoarm CCS synthesis in 40% water/ethanol, [PMEA]=10.7 mmol/L, [PMEA]:[BA]:[HDDA]:[V-50]=1:10:5:0.1, 70°C. (A) GPC curves of CCS synthesis at different reaction times; (B) PMEAs arm conversion as a function of reaction time; (C) kinetic plot of  $\ln([Arm]_0/[Arm])$  vs reaction time; and (D) linear fit of kinetic plot within the first 2 h of reaction.

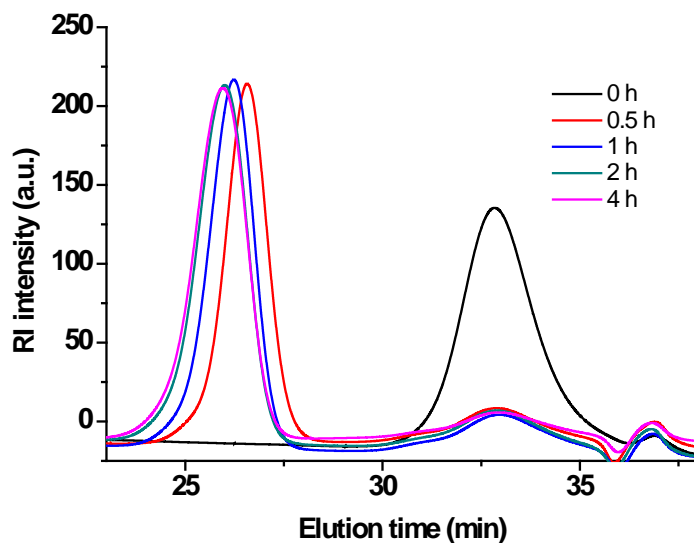

**Fig. S4** GPC curves of PMEa homoarm CCS synthesis in 50% water/ethanol at different reaction times. [PMEa]=10.7 mmol/L, [PMEa]:[BA]:[HDDA]:[V-50]=1:10:5:0.1, 70°C.

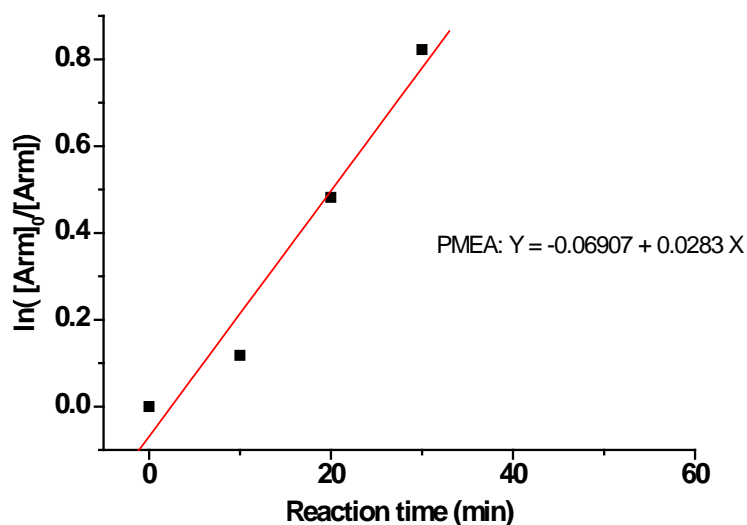

**Fig. S5** Linear plot of  $\ln([Arm]_0/[Arm])$  vs time for PMEa homoarm CCS synthesis within the first 30 min of reaction in 50% water/ethanol. [PMEa]=10.7 mmol/L, [PMEa]:[BA]:[HDDA]:[V-50]=1:10:5:0.1, 70°C.

## (2) Preparation of PDMA homoarm CCS

Because PDMA is well soluble in water, ethanol and their mixtures of any ratios, PDMA homoarm CCS was prepared directly in 50% water/ethanol solution. Similarly, the molar ratio of

PDMA arm:BA:HDDA:V-50 was controlled at 1:10:5:0.1. The formation of PDMA CCS as a function of time is shown in Fig. S6.

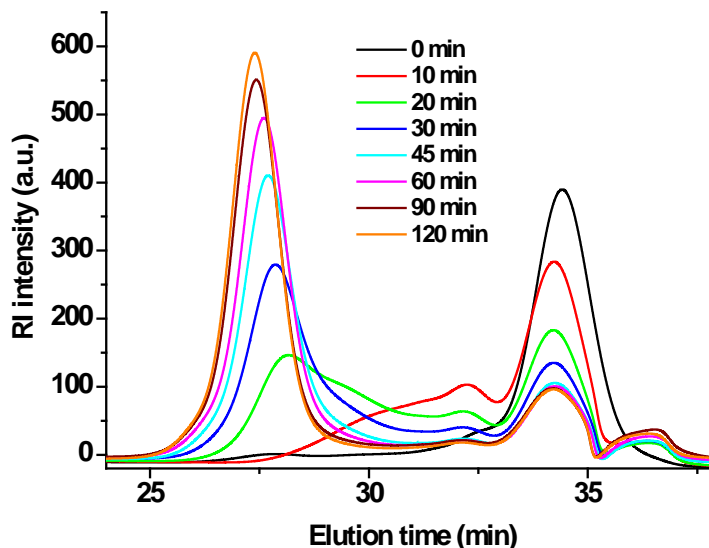

**Fig. S6** GPC curves of PDMA homoarm CCS synthesis in 50% water/ethanol at different reaction times. [PDMA]=10.7 mmol/L, [PDMA]:[BA]:[HDDA]:[V-50]=1:10:5:0.1, 70°C.

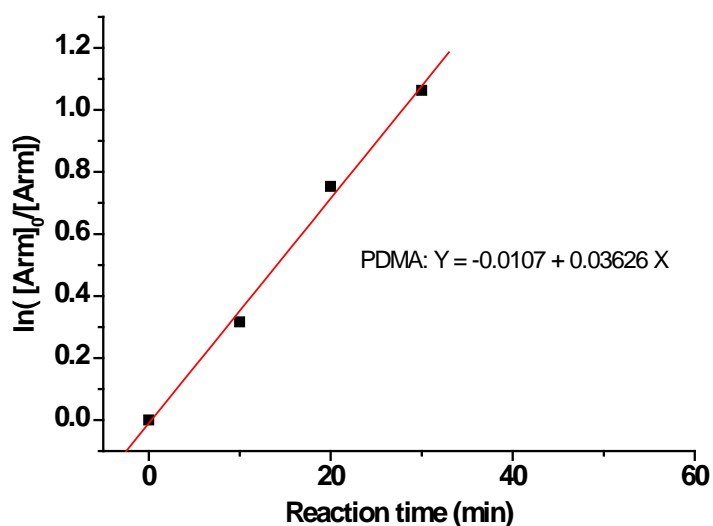

**Fig. S7** Linear plot of  $\ln([Arm]_0/[Arm])$  vs time for PDMA homoarm CCS synthesis within the first 30 min of reaction in 50% water/ethanol. [PDMA]=10.7 mmol/L, [PDMA]:[BA]:[HDDA]:[V-50]=1:10:5:0.1, 70°C.



### (3) Preparation of PDMA-PMEA amphiphilic heteroarm CCS

PDMA-PMEA amphiphilic heteroarm CCSs were synthesized in either 40% or 50% water/ethanol under conditions similar to PMEA and PDMA homoarm CCS synthesis. The molar ratio (calculated from theoretical molecular weight) of PDMA and PMEA was maintained at 1:1, and the molar ratio of total arm polymer (PDMA+PMEA):BA:HDDA:V-50 was 1:10:5:0.1. For kinetic study, samples were withdrawn at predetermined time intervals. The heteroarm CCS synthesized in 50% water/ethanol was purified by first dialysis against acetone using dialysis tubing (MWCO 25 kDa), followed by precipitation into diethyl ether. The collected polymer was re-dissolved in THF and precipitated into ether.

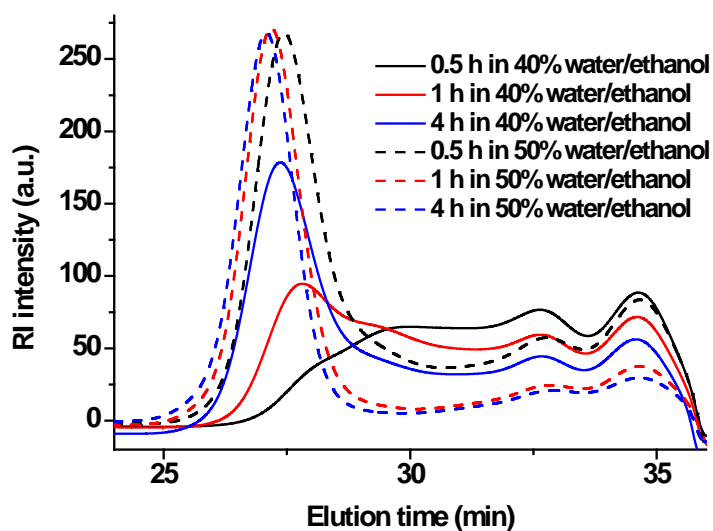

**Fig. S8** GPC curves of PDMA-PMEA heteroarm CCS synthesis at different reaction times in 40% and 50% water/ethanol solutions.  $[\text{PDMA}+\text{PMEA}]=10.7$  mmol/L,  $[\text{PDMA}+\text{PMEA}]:[\text{BA}]:[\text{HDDA}]:[\text{V-50}]=1:10:5:0.1$ ,  $70^\circ\text{C}$ .

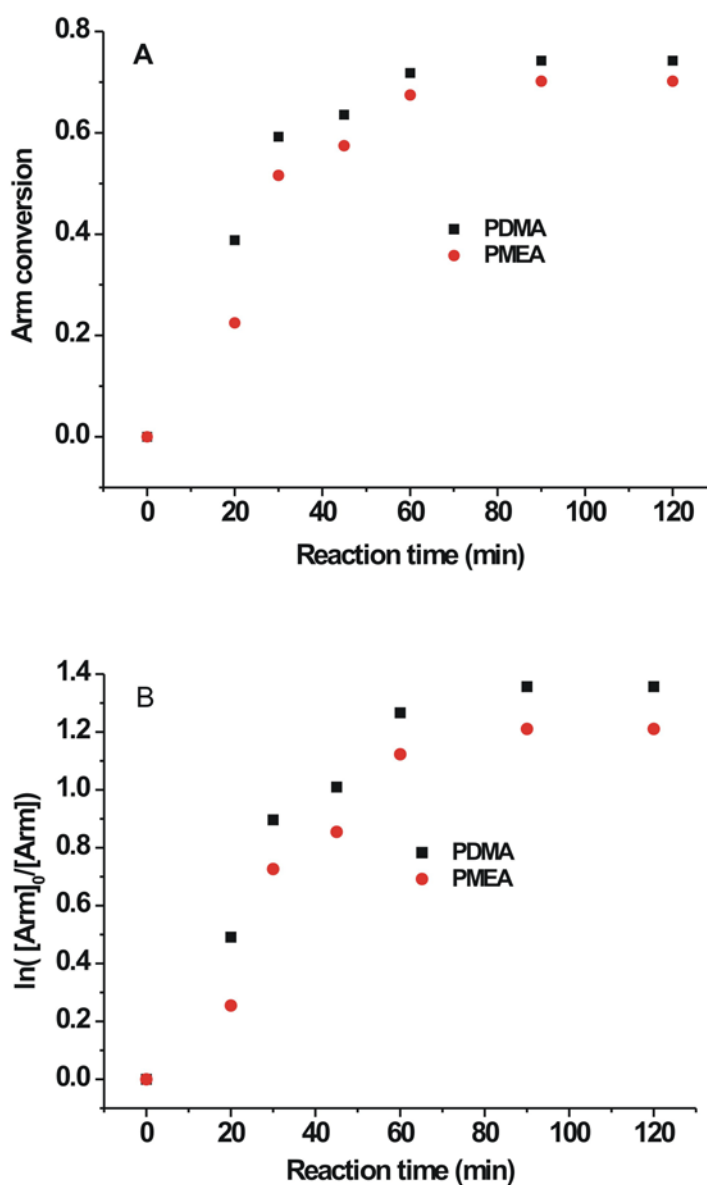

**Fig. S9** PDMA-PMEA heteroarm CCS synthesis in 50% water/ethanol solution,  $[PDMA+PMEA]=10.7$  mmol/L,  $[PDMA+PMEA]:[BA]:[HDDA]:[V-50]=1:10:5:0.1$ ,  $70^\circ\text{C}$ . (A) Conversion of arm polymer as a function of reaction time; (C) kinetic plot of  $\ln([Arm]_0/[Arm])$  vs reaction time. *The data point at 10 min was not used due to significant overlap of the formed polymers with the arm polymers.*

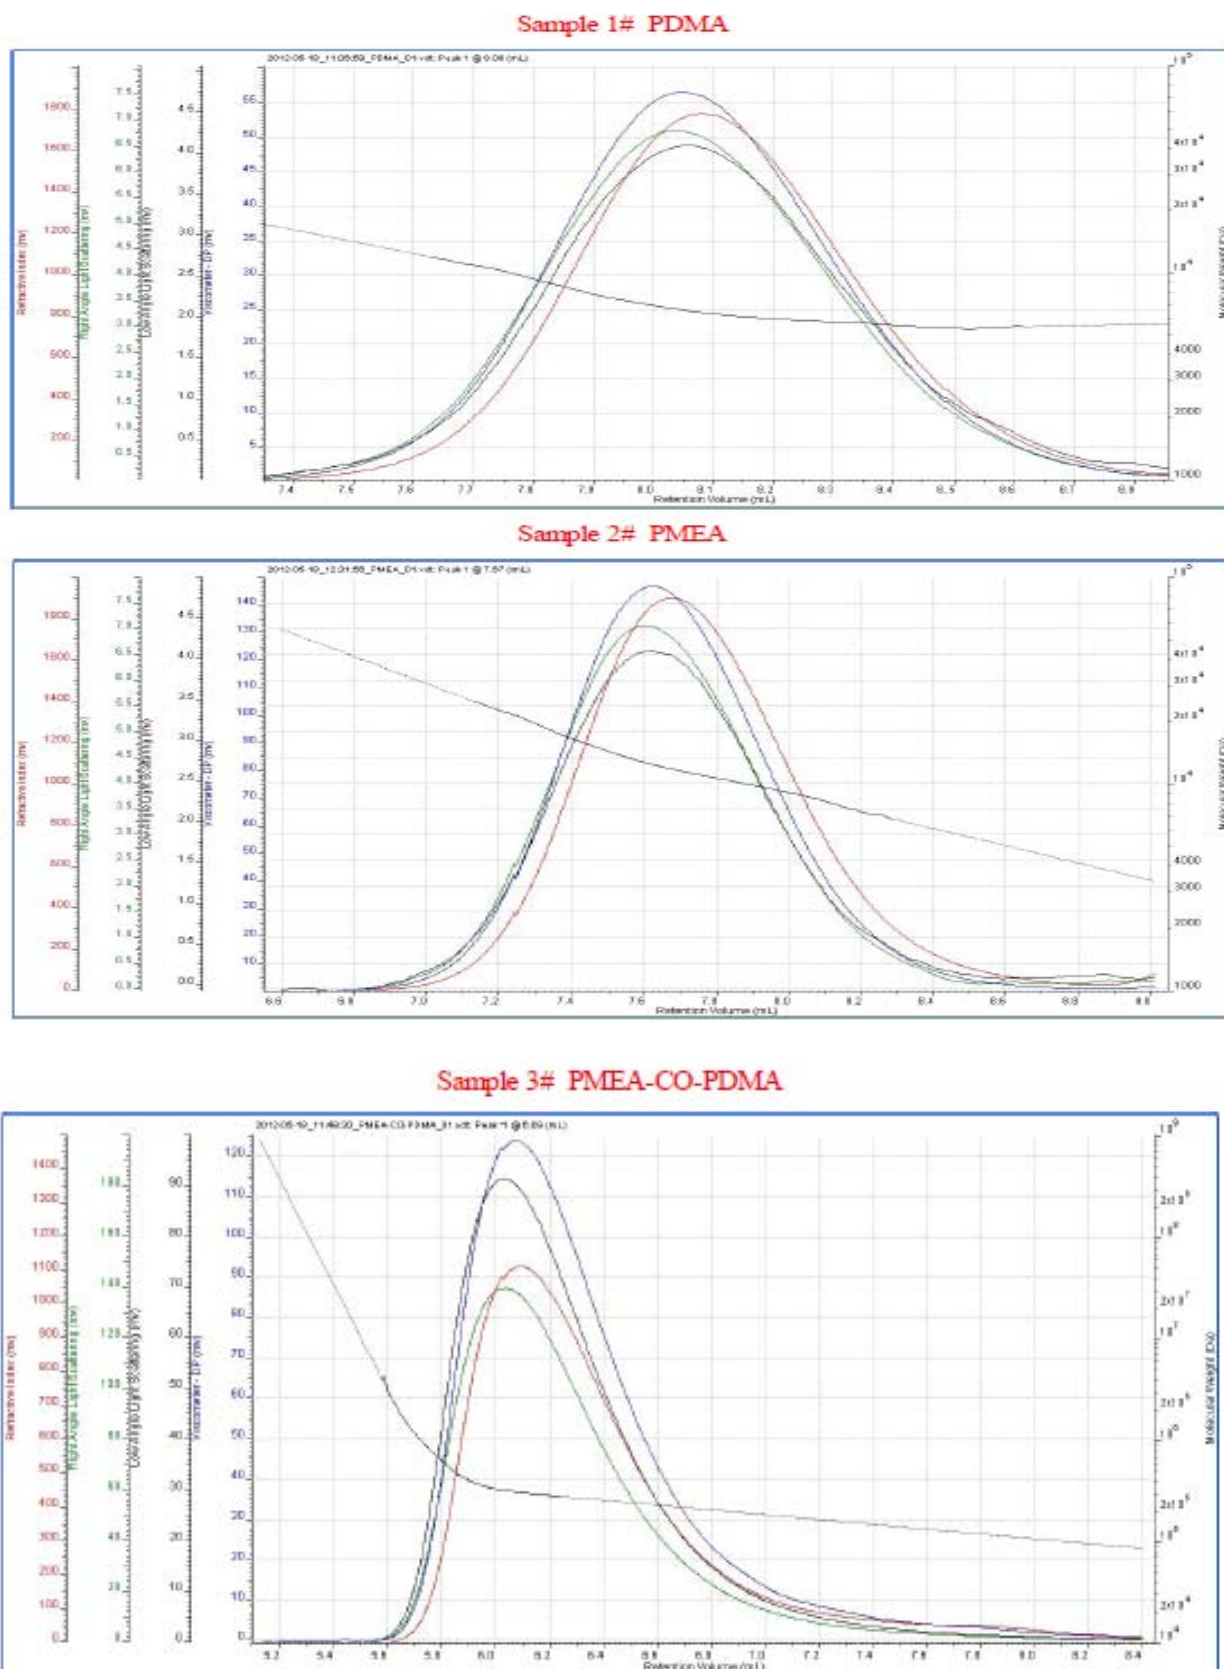

**Fig. S10** GPC curves for PDMA and PMEA arm polymers and their heteroarm CCS measured by triple-detection GPC.

**Table S1** Macromolecular parameters for PDMA arm measured by triple-detection GPC.

|                                   | PDMA arm |        | Average | RSD% |
|-----------------------------------|----------|--------|---------|------|
| $M_n$ (Da)                        | 6 602    | 6 425  | 6 514   | 1.92 |
| $M_w$ (Da)                        | 6 862    | 6 738  | 6 800   | 1.29 |
| $M_w/M_n$                         | 1.039    | 1.049  | 1.044   | 0.68 |
| Mark-Houwink $\alpha$             | 0.731    | 0.720  | 0.726   | 1.07 |
| Hydrodynamic radius $R_h$<br>(nm) | 1.766    | 1.754  | 1.760   | 0.48 |
| $dn/dc$                           | 0.0728   | 0.0731 | 0.0730  | 0.29 |

**Table S2** Macromolecular parameters for PMEA arm measured by triple-detection GPC.

|                                   | PMEA arm |        | Average | RSD% |
|-----------------------------------|----------|--------|---------|------|
| $M_n$ (Da)                        | 11 652   | 10 981 | 11 317  | 4.19 |
| $M_w$ (Da)                        | 12 494   | 12 050 | 12 272  | 2.56 |
| $M_w/M_n$                         | 1.072    | 1.097  | 1.085   | 1.63 |
| Mark-Houwink $\alpha$             | 0.790    | 0.749  | 0.770   | 3.77 |
| Hydrodynamic radius<br>$R_h$ (nm) | 2.267    | 2.240  | 2.254   | 0.85 |
| $dn/dc$                           | 0.0373   | 0.0375 | 0.0374  | 0.38 |

**Table S3** Macromolecular parameters for PDMA-PMEA heteroarm CCS measured by triple-detection GPC.

|                                   | Heteroarm CCS |         | Average | RSD% |
|-----------------------------------|---------------|---------|---------|------|
|                                   |               |         |         |      |
| $M_n$ (Da)                        | 259 766       | 272 828 | 266 297 | 3.47 |
| $M_w$ (Da)                        | 289 263       | 298 357 | 293 810 | 2.19 |
| $M_w/M_n$                         | 1.114         | 1.094   | 1.104   | 1.28 |
| Mark-Houwink $\alpha$             | 0.556         | 0.531   | 0.544   | 3.25 |
| Hydrodynamic radius<br>$R_h$ (nm) | 8.065         | 8.162   | 8.114   | 0.85 |
| $dn/dc$                           | 0.0504        | 0.0503  | 0.0504  | 0.14 |

### Calculation of arm numbers in heteroarm CCS.

In the calculation, we assumed that conversion of BA and HDDA was 100%, which is reasonable considering the high polymerization rate and high conversion in heterogeneous polymerization systems.

The arm weight fraction in the heteroarm CCS is given by

$$\chi_{arm} = \frac{m_{PDMA}conv_{PDMA} + m_{PMEA}conv_{PMEA}}{(m_{PDMA}conv_{PDMA} + m_{PMEA}conv_{PMEA}) + (m_{BA}conv_{BA} + m_{HDDA}conv_{HDDA})}$$

in which,  $m_{PDMA} = 0.5465$  g,  $conv_{PDMA} = 0.74$ ,  $m_{PMEA} = 1.0093$  g,  $conv_{PMEA} = 0.70$ ,  $m_{BA} = 0.2759$  g,  $conv_{BA} = 1.0$ ,  $m_{HDDA} = 0.2424$  g,  $conv_{HDDA} = 1.0$ .

Thus,  $\chi_{arm} = 0.68$ .

The molar ratio of PDMA and PMEA in the final heteroarm CCS was estimated from  $^1\text{H}$  NMR, which was 1.14:1.

According to the following equation, we calculated the number of arm in the heteroarm CCS:

$$\chi_{arm} M_{w,star} = N_{PDMA} M_{w,PDMA} + N_{PMEA} M_{w,PMEA}$$

in which,  $\chi_{arm} = 0.68$ ,  $M_{w,star} = 293\,810$ ,  $N_{PDMA} = 1.14N_{PMEA}$ ,  $M_{w,PDMA} = 6\,800$ ,  $M_{w,PMEA} = 12\,272$ .

Thus,  $N_{PDMA} = 11$ ,  $N_{PMEA} = 10$ .

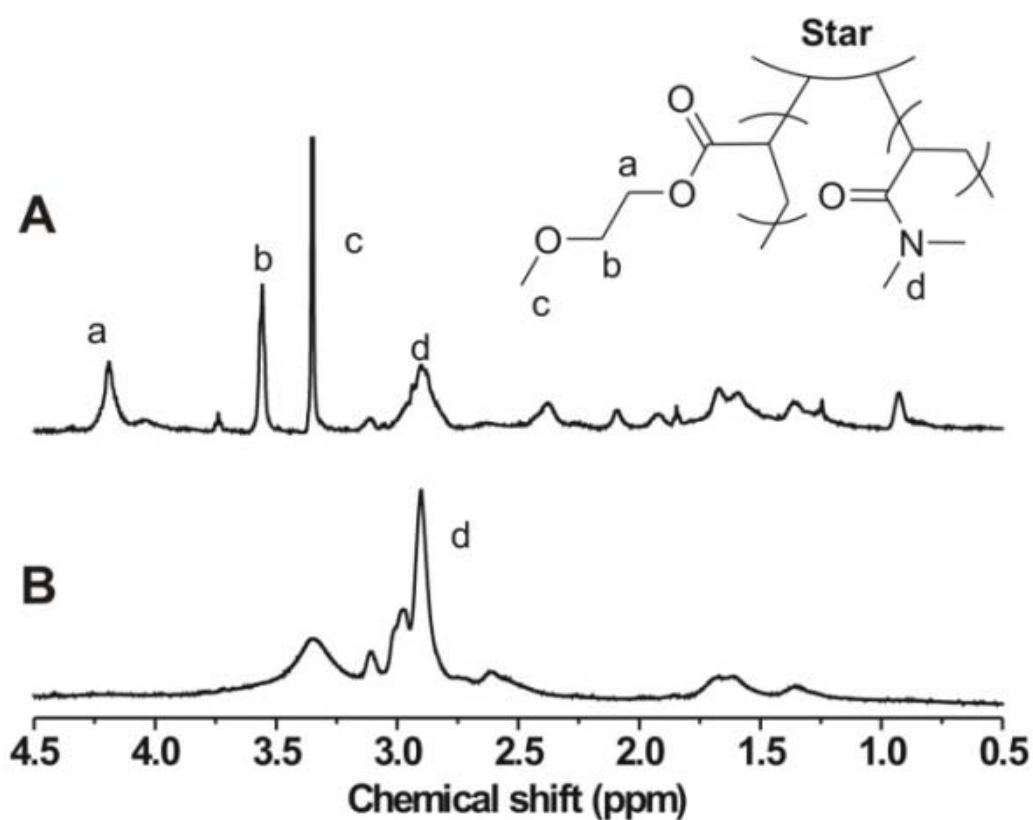

**Fig.S11**  $^1\text{H}$  NMR spectra of heteroarm CCS in (A)  $\text{CDCl}_3$  and (B)  $\text{D}_2\text{O}$ .

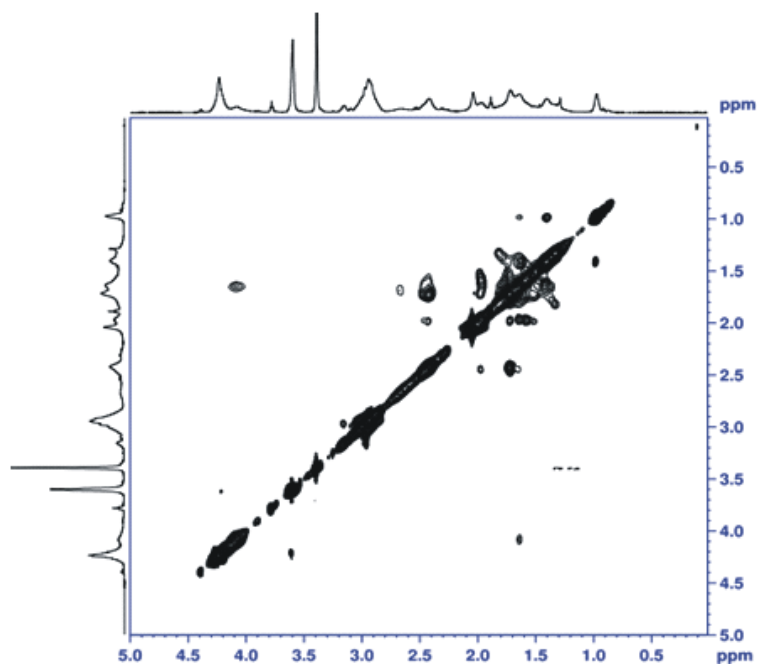

**Fig. S12** 2D NOESY  $^1\text{H}$  NMR of PDMA-PMEA heteroarm CCS in  $\text{CDCl}_3$ .

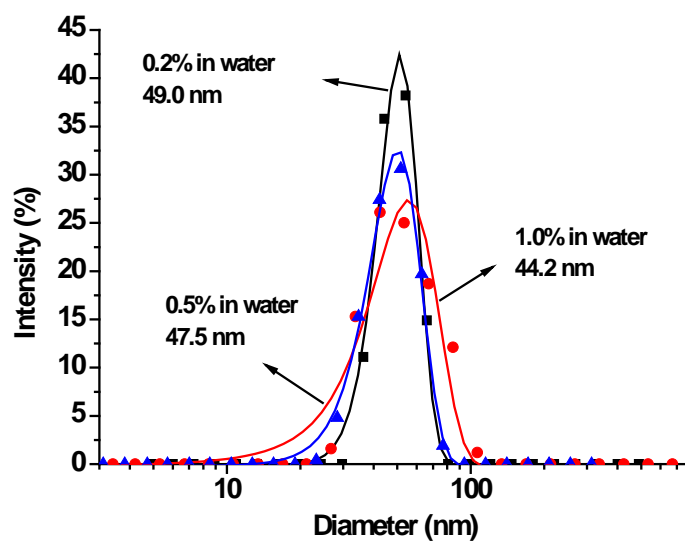

**Fig. S13** DLS results of 0.2%, 0.5% and 1.0% amphiphilic PDMA-PMEA heteroarm CCS in water.

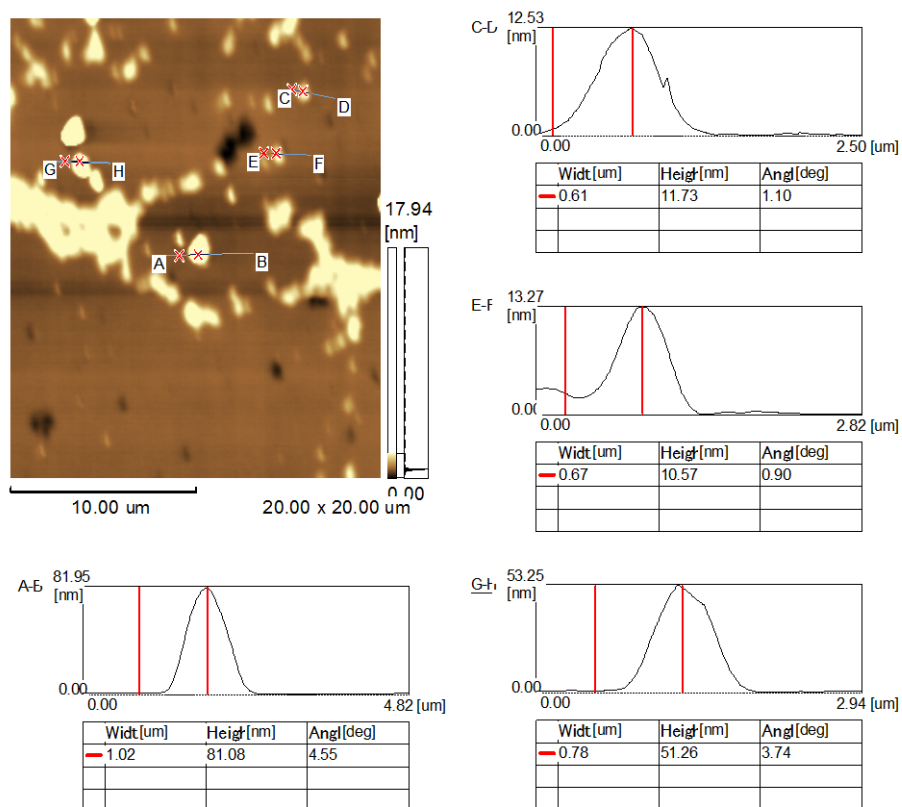

**Fig. S14** AFM micrograph and data analysis of a sample prepared from 0.1% amphiphilic heteroarm CCS in water.

#### Reference

1. Q. Qiu, G. Liu and Z. An, *Chem. Commun.*, 2011, **47**, 12685-12687.
